# Supplementary material for: High-performance, fast-response photodetectors based on hydrothermally synthesized V1−xMoxSe2 nanosheets
Source: Royal Society of Chemistry journal article supplement (doi:10.1039/d4dt02844a), 2024-11-19
Supplement: d4dt02844a1.pdf [file d4dt02844a1.pdf]

## Supporting information

### **High-performance, fast-response photodetector based on hydrothermally synthesized $V_{1-x}Mo_xSe_2$ nanosheets**

Abinash Parida<sup>1</sup>, Devarajan Alagarasan<sup>2</sup>, Ramakanta Naik<sup>1\*</sup>

<sup>1</sup>*Department of Engineering and Materials Physics, ICT-IOC Bhubaneswar, 751013, India*

<sup>2</sup>*Department of Physics, Nitte Meenakshi Institute of Technology, Yelahanka, 560064, India*

\*Corresponding authors:

R. Naik-ramakanta.naik@gmail.com

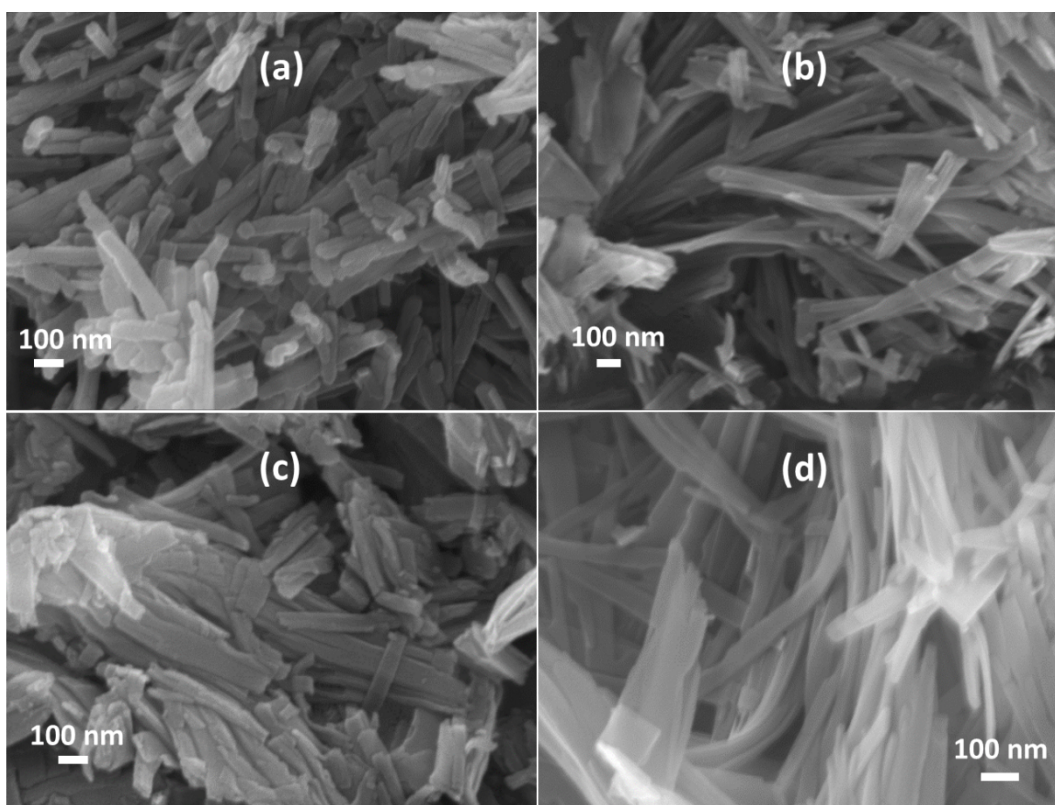

**Fig. S1.** Magnified FESEM images of (a) V2 sample, (b) V3 sample, (c) V4 sample, and (d) V5 sample in the nanometer scale for better understanding of the morphology of the prepared samples.

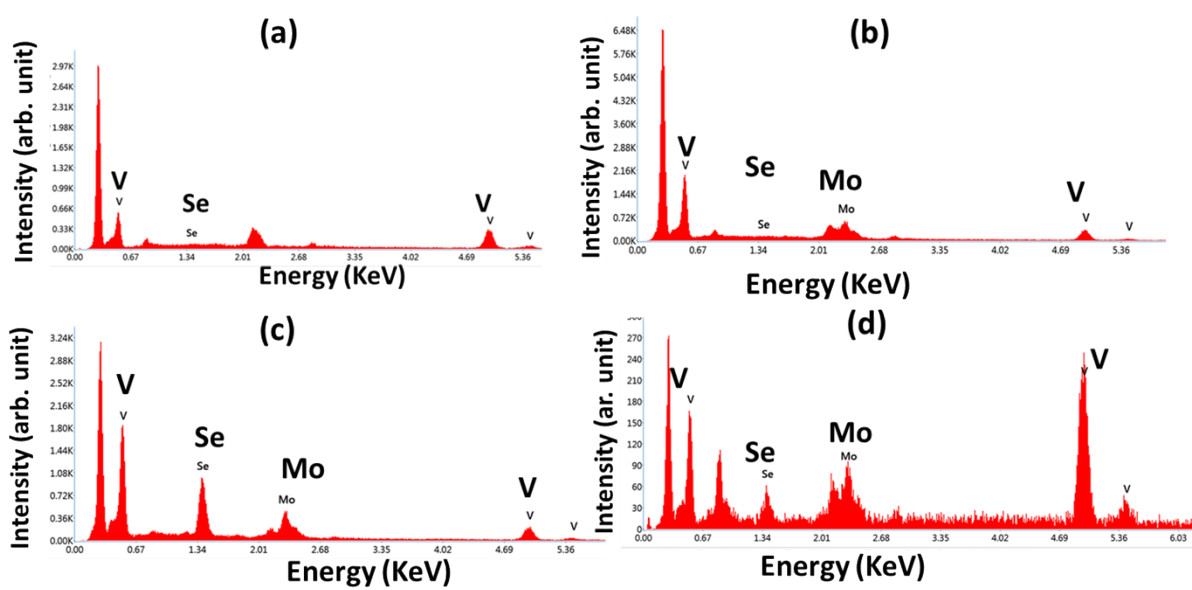

**Fig. S2.** Individual EDX spectra of (a) V1 sample, (b) V2 sample, (c) V3 sample, and (d) V4 sample, which confirms the presence of all the compositional elements in the prepared samples.

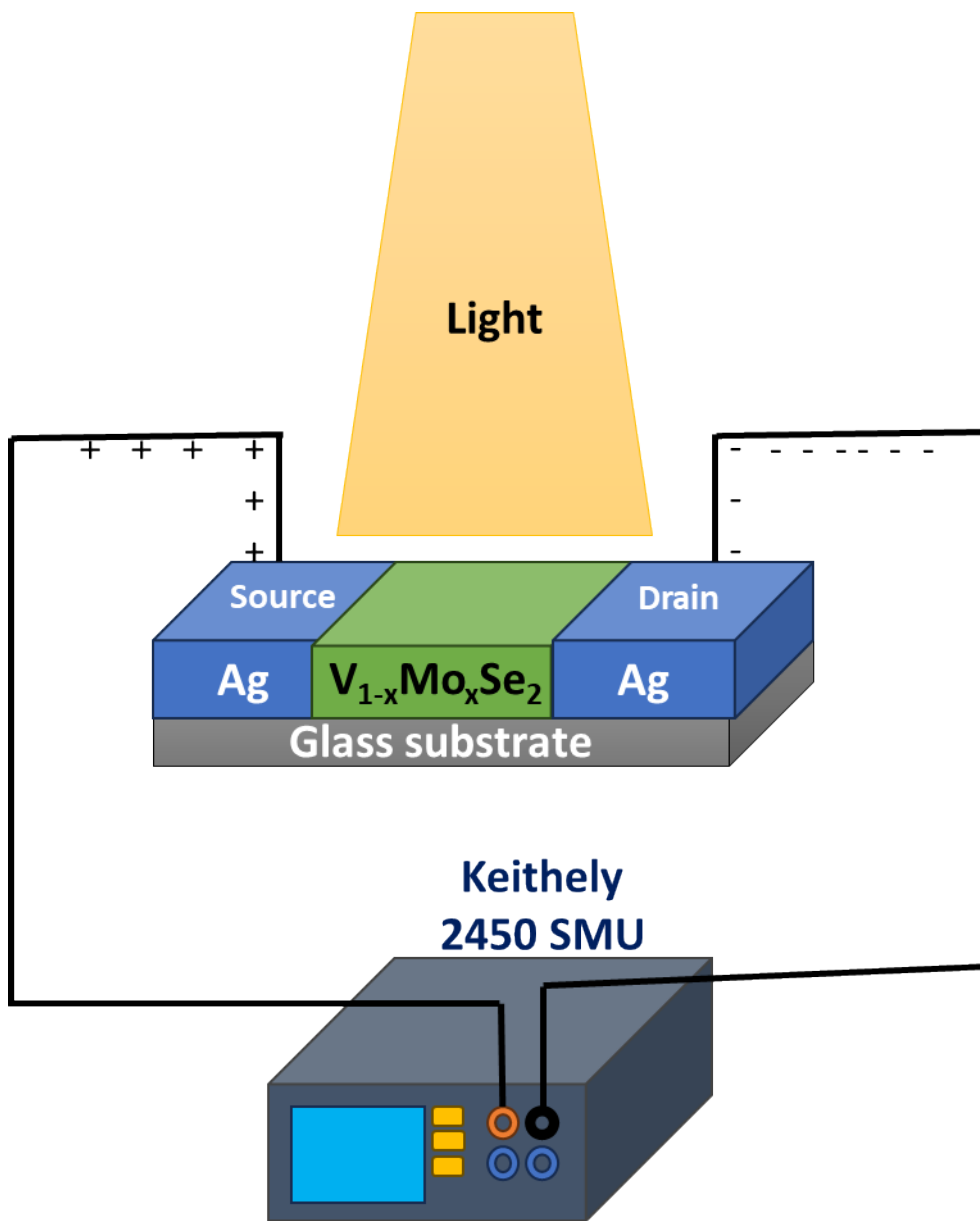

**Fig. S3.** Complete process of photo response measurement of the prepared samples.

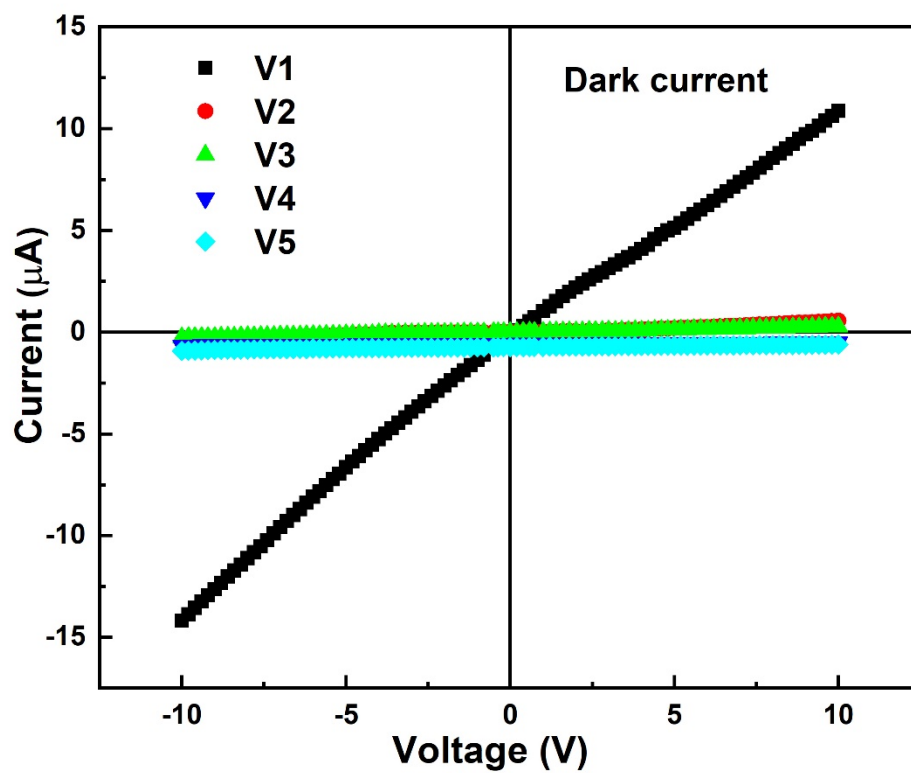

**Fig. S4.** I~V characteristics of all the prepared samples, showing the dark current where voltage sweeps between -10 V to +10 V.

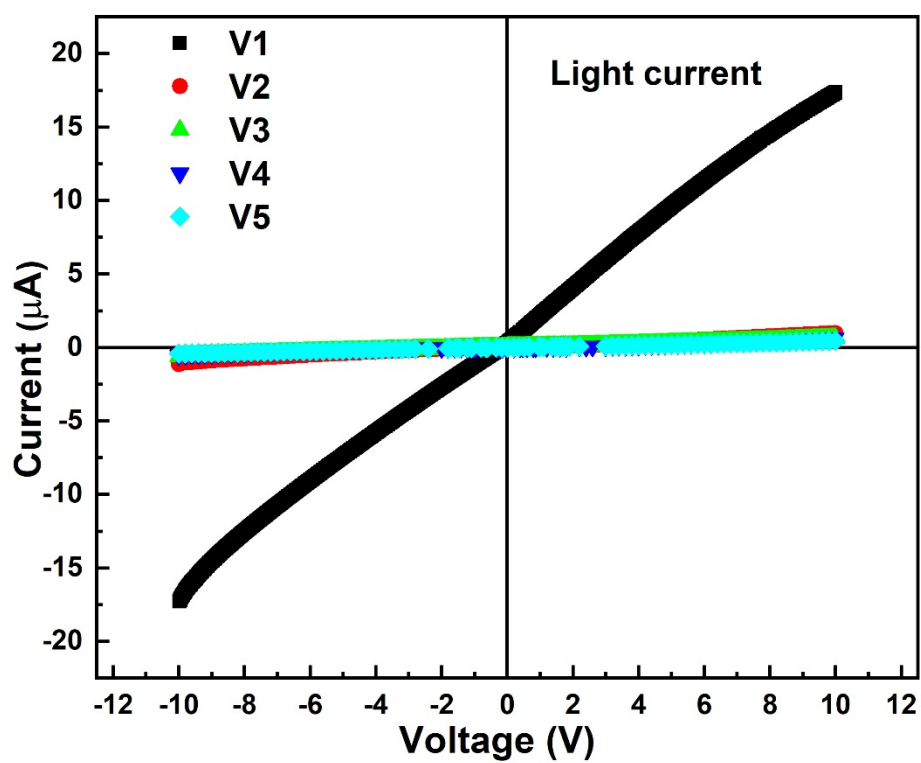

**Fig. S5.** I~V characteristics of all the prepared samples, showing the light current where voltage sweeps between -10 V to +10 V.

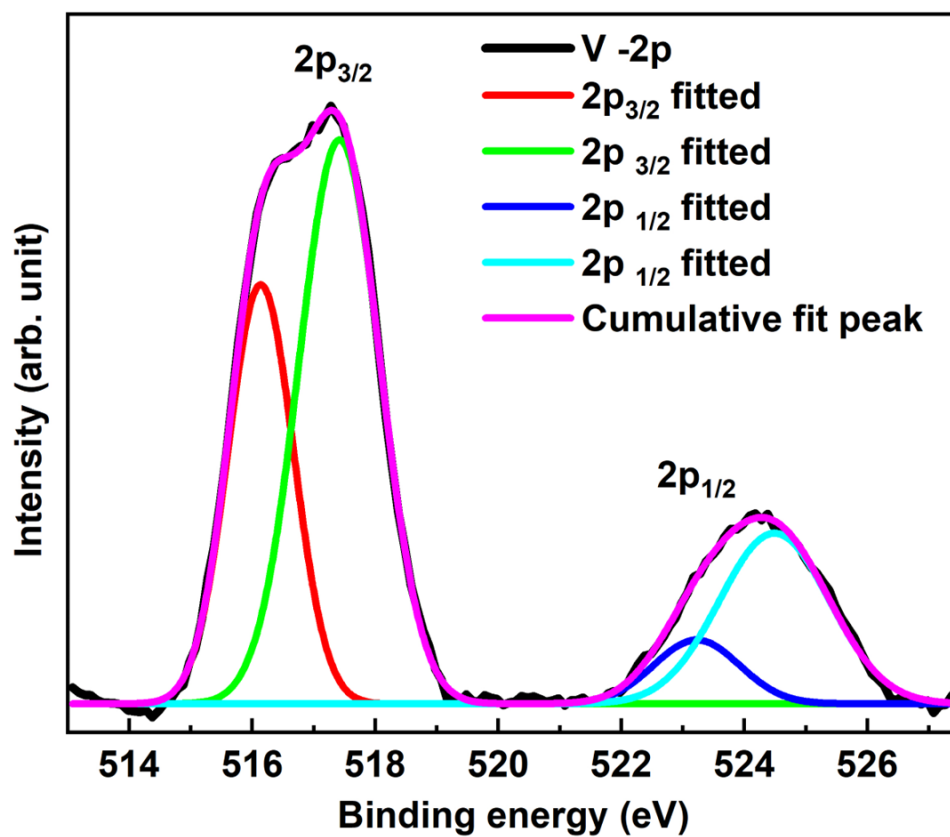

Fig. S6: XPS fitting curve of vanadium 2p for the sample V1.

**Table S1.** Showing the atomic percentage of constituent elements of all the prepared samples.

| <b>Sample</b>  | <b>V1</b> | <b>V2</b> | <b>V3</b> | <b>V4</b> | <b>V5</b> |
|----------------|-----------|-----------|-----------|-----------|-----------|
| <b>Element</b> | At. %     |
| <b>V</b>       | 38.6      | 37.2      | 36.9      | 35.4      | 34.1      |
| <b>Mo</b>      | 0         | 2.1       | 3.4       | 6.1       | 8.2       |
| <b>Se</b>      | 61.4      | 60.7      | 59.7      | 58.5      | 57.7      |
| <b>Total</b>   | 100.00    | 100.00    | 100.00    | 100.00    | 100.00    |
